# Supplementary material for: Oxide versus oxynitride cobalt and nickel thin-film electrocatalysts prepared by reactive sputtering for alkaline oxygen reduction reaction
Source: Royal Society of Chemistry journal article supplement (doi:10.1039/d6ra02496c), 2026-04-29
Supplement: d6ra02496c1.pdf [file d6ra02496c1.pdf]

**Oxide versus oxynitride Co and Ni thin-film electrocatalysts prepared by  
reactive sputtering for alkaline ORR**

\*Aiman Hakim Supee, Shion Sugimoto, \*Yosuke Ishii, \*Shinji Kawasaki

Department of Life Science and Applied Chemistry, Nagoya Institute of Technology  
Gokiso-cho, Showa-ku, Nagoya, 466-8555, Japan

**Corresponding Author**

Email: [s.aimanhakim.571@stn.nitech.ac.jp](mailto:s.aimanhakim.571@stn.nitech.ac.jp) , [yosuke.ishii@nitech.ac.jp](mailto:yosuke.ishii@nitech.ac.jp),  
[kawasaki.shinji@nitech.ac.jp](mailto:kawasaki.shinji@nitech.ac.jp)

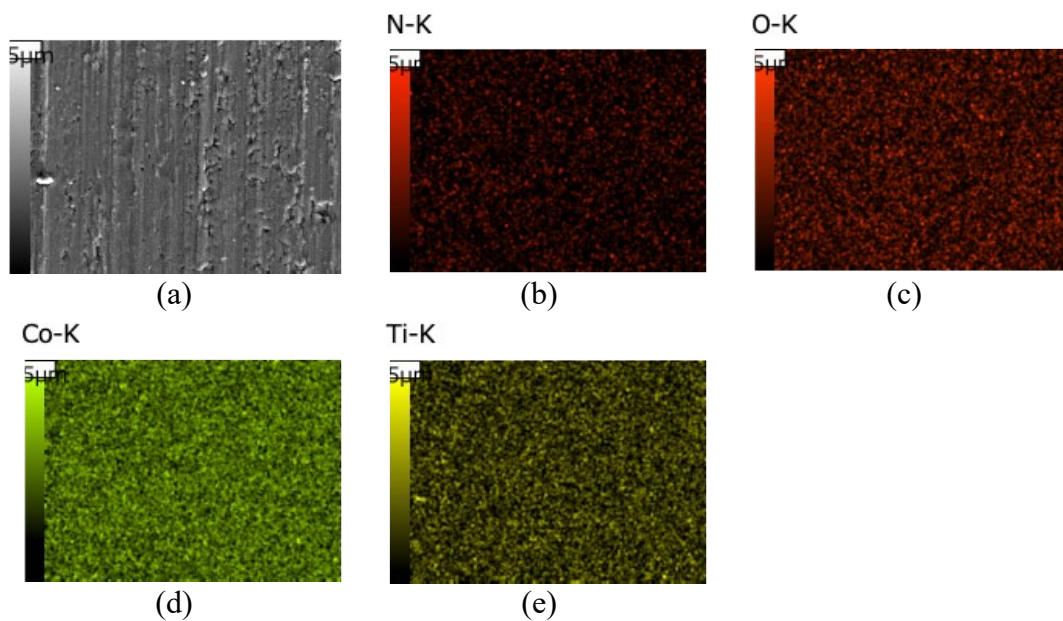

Figure S1 EDS elemental analysis of  $\text{CoO}_{1.6}\text{N}_{0.12}$  sputtered on Ti block. Spectra were acquired from the film region shown in the (a) SEM image for (b) N, (c) O, (d) Co, and (e) Ti

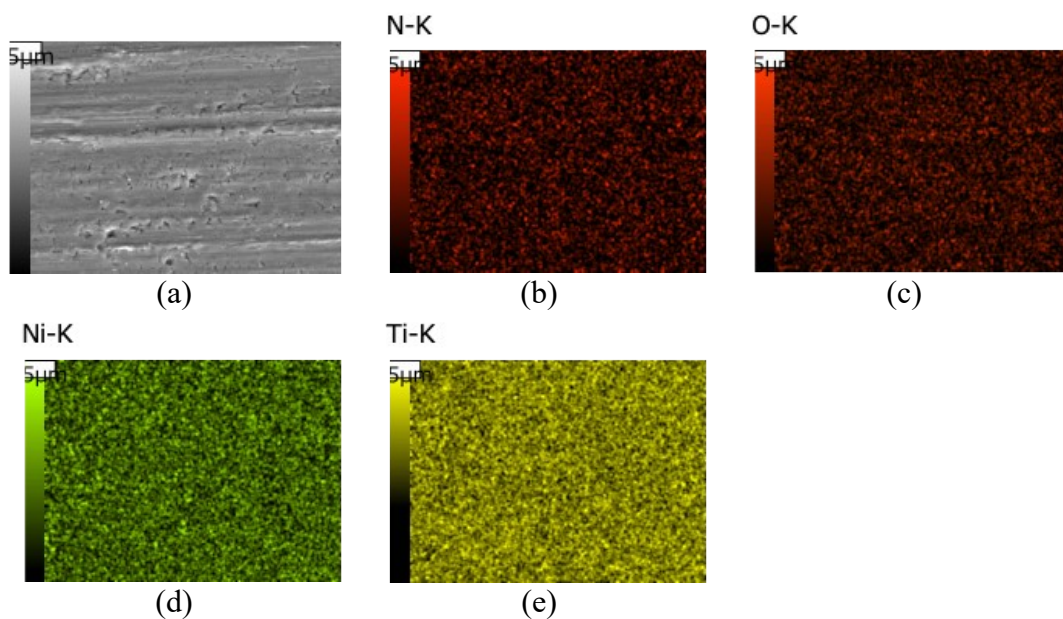

Figure S2 EDS elemental analysis of  $\text{NiO}_{1.14}\text{N}_{0.18}$  sputtered on Ti block. Spectra were acquired from the film region shown in the (a) SEM image for (b) N, (c) O, (d) Ni, and (e) Ti

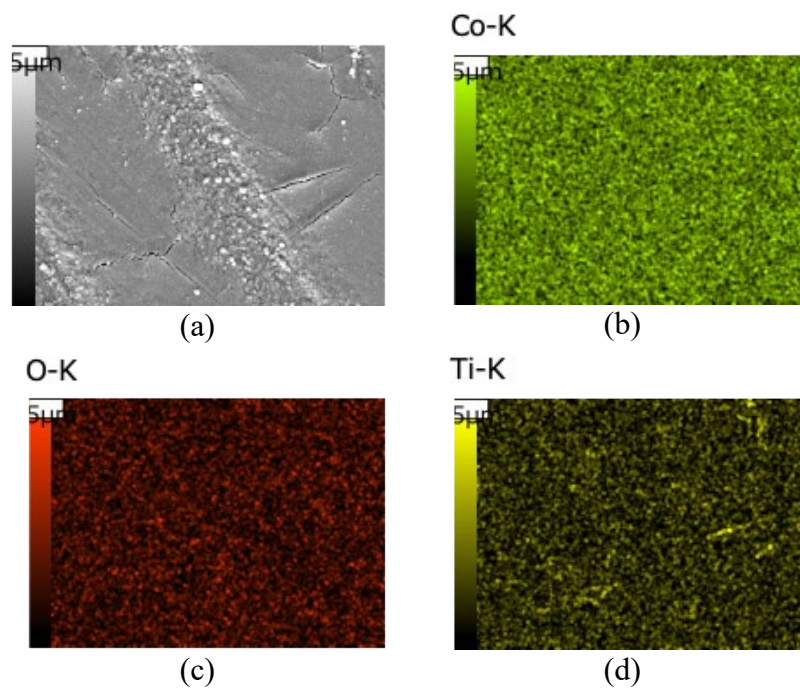

Figure S3 EDS elemental analysis of  $\text{CoO}_{1.8}$  sputtered on Ti block. Spectra were acquired from the film region shown in the (a) SEM image for (b) Co, (c) O, and (d) Ti

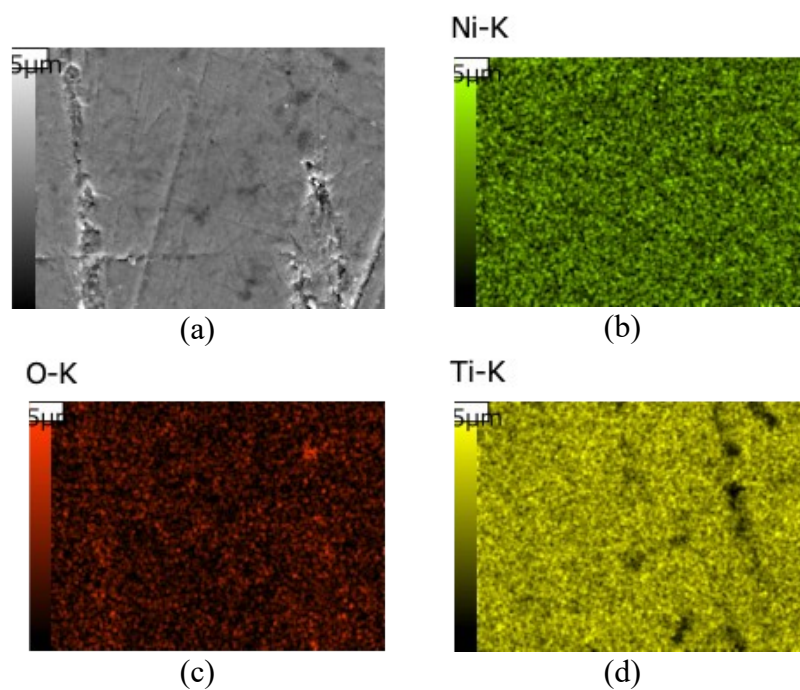

Figure S4 EDS elemental analysis of  $\text{NiO}_{1.3}$  sputtered on Ti block. Spectra were acquired from the film region shown in the (a) SEM image for (b) Ni, (c) O, and (d) Ti

Table S1 Elemental composition determined from XPS analysis for the sputtered sample

| Sample                                 | Atomic concentration (%) |       |       |      |       |
|----------------------------------------|--------------------------|-------|-------|------|-------|
|                                        | Co2p                     | Ni2p  | O1s   | N1s  | C1s   |
| CoO <sub>1.6</sub> Ni <sub>0.12</sub>  | 27.61                    | -     | 45.25 | 3.45 | 23.69 |
| NiO <sub>1.14</sub> Ni <sub>0.18</sub> | -                        | 31.86 | 36.29 | 5.75 | 26.10 |
| CoO <sub>1.8</sub>                     | 25.75                    | -     | 47.04 | 0.32 | 26.89 |
| NiO <sub>1.3</sub>                     | -                        | 31.29 | 40.58 | 0.60 | 27.53 |

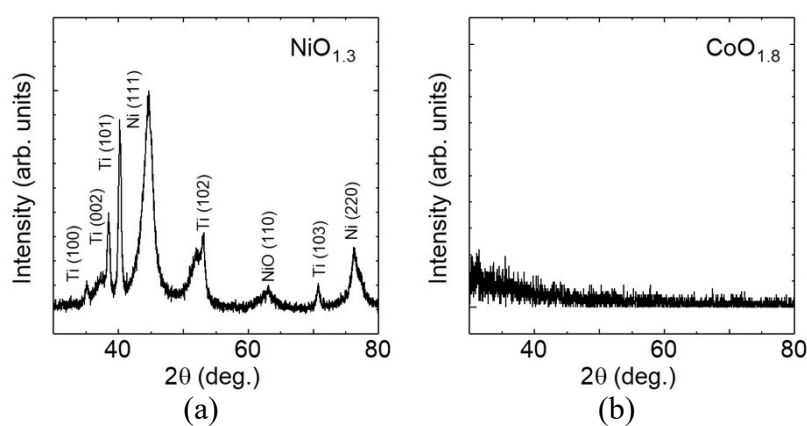

Figure S5 Thin film XRD pattern for (a) NiO<sub>1.3</sub> and (b) CoO<sub>1.8</sub>

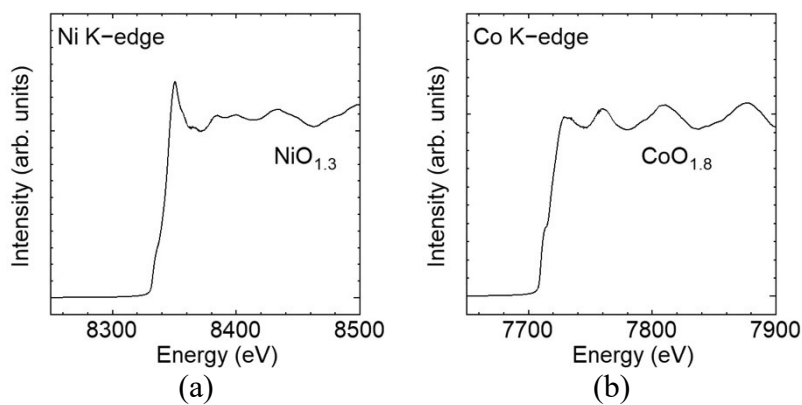

Figure S6 XANES spectra at Ni K-edges for (a) NiO<sub>1.3</sub> and Co K-edge for (b) CoO<sub>1.8</sub>

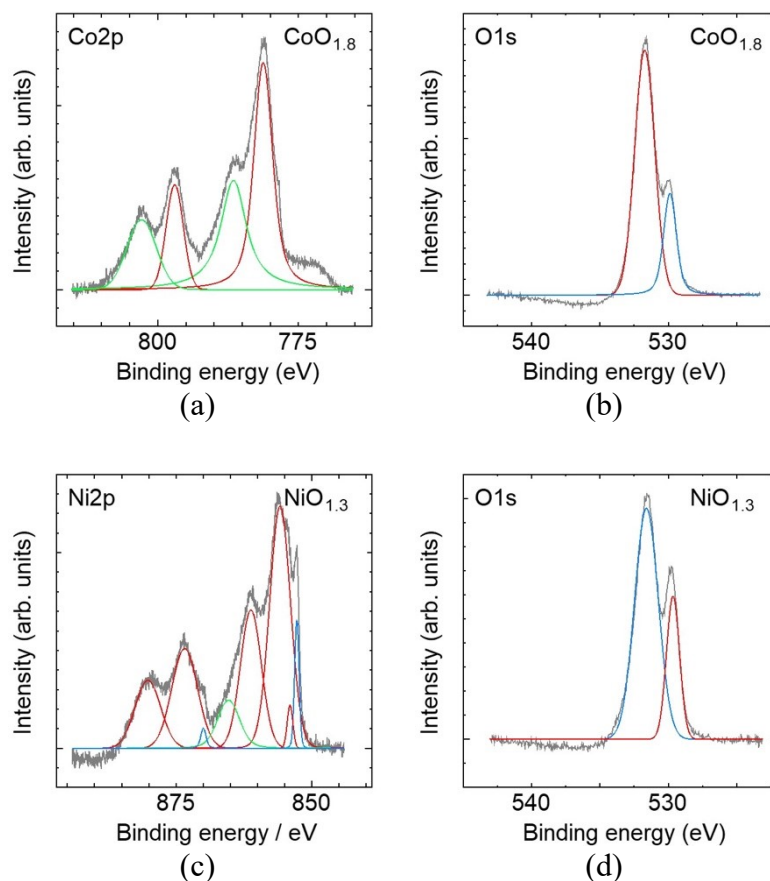

Figure S7 XPS spectra of reactive-sputtered Ni- and Co-based films. Shown are the (a) Co2p and (b) O1s for CoO<sub>1.8</sub> and (c) Ni2p and (d) O1s for NiO<sub>1.3</sub>

Table S2 Performance comparison with other catalyst

| Catalyst                                                         | ORR onset potential (V vs RHE) | Electron transfer number | Electrolyte   | Ref.      |
|------------------------------------------------------------------|--------------------------------|--------------------------|---------------|-----------|
| rGO/(Ni <sup>2+</sup> -THPP/Co <sup>2+</sup> -THPP) <sub>8</sub> | 0.84                           | 3.83                     | 0.1M KOH aq.  | [22]      |
| NiN <sub>2</sub> Ge <sub>2</sub>                                 | 0.92                           | -                        | N/A           | [23]      |
| Pd@CoO <sub>x</sub> /NC1                                         | 1.02                           | 4.02                     | 0.1M KOH aq.  | [2]       |
| Co <sub>3</sub> O <sub>4</sub> /CIMP-MW                          | 0.83                           | 3.71                     | 0.1M NaOH aq. | [24]      |
| CoO <sub>x</sub> N <sub>y</sub> on Ti disk                       | 0.82                           | 4.0                      | 0.1M KOH aq.  | This work |
| CoO <sub>x</sub> N <sub>y</sub> /SWCNT                           | 0.83                           | 3.75                     | 0.1M KOH aq.  | This work |
